# Supplementary material
Source: publisher site journal article supplement (https://www.dovepress.com/article/436645)
Supplement: Supplementary file 1 [file get_supplementary_file.php]

Recruitment:

21 individuals with CRPS

2 individuals with CRPS type II excluded

Recruitment:

16 matched HC

Clinical & pain assessment:

19 individuals with CRPS type I

Definition of painful, contralateral & control area:

19 CRPS type I

16 matched HC

Questionnaires (HADS & PCS), CHEPs recording and QST in all three areas:

19 individuals with CRPS type I

16 matched HC

Completed the study:

18 individuals with CRPS type I

16 matched HC

1 individual with CRPS type I excluded due to noncompliance during CHEPs

**Figure S1:** Flowchart showing the recruitment and exclusion of individuals with CRPS type I, matched HC and the data recording.

*CRPS: complex regional pain syndrome; HADS: Hospital Anxiety and Depression Scale; HC: healthy control; PCS: Pain Catastrophizing Scale*

**Table S2:** Raw data of HPT, MPT (a), and MPS (b). Data is presented as mean ± SD. Pain ratings for the different stimulation intensities are presented as NRS (0-100).

| **a)** | |  | HPT (°C) | MPT (mN) |
| --- | --- | --- | --- | --- |
| painful | CRPS, n=18 | | 40.9 (± 4.9) | 22.7(± 19.4) |
| HC, n=16 | | 43.8 (± 3.2) | 31.4 (± 28.7) |
| contralateral | CRPS, n=17 | | 42.9 (± 3.6) | 32.4 (± 19.8) |
| HC, n=16 | | 44.1 (± 3.7) | 37.8 (± 29.2) |
| control | CRPS, n=15 | | 44.3 (± 2.7) | 52.9 (± 83.1) |
| HC, n=15 | | 45.6 (± 2.5) | 57.7 (± 147.2) |

| **b)** | |  | NRS  8 mN | NRS  16 mN | NRS  32 mN | NRS  64 mN | NRS  128 mN | NRS  256 mN | NRS  512 mN |
| --- | --- | --- | --- | --- | --- | --- | --- | --- | --- |
| painful | CRPS, n=18 | | 6.2  (± 6.9) | 11.1  (± 10.7) | 11.2  (± 9.0) | 16.9  (± 10.7) | 27.3  (± 14.6) | 35.1  (± 17.2) | 46.8  (± 21.7) |
| HC, n=16 | | 2.0  (± 2.6) | 3.4  (± 2.1) | 3.5  (± 2.5) | 3.8  (± 3.2) | 7.8  (± 5.4) | 12.0  (± 8.5) | 17.6  (± 15.6) |
| contralateral | CRPS, n=17 | | 3.4  (± 5.4) | 2.7  (± 4.6) | 4.9  (± 4.5) | 11.4  (± 9.5) | 15.4  (± 10.3) | 25.6  (± 20.1) | 34.2  (± 25.8) |
| HC, n=16 | | 2.1  (± 2.6) | 1.8  (± 2.1) | 2.8  (± 2.5) | 3.8  (± 3.2) | 7.7  (± 5.4) | 11.2  (± 8.5) | 19.3  (± 15.6) |
| control | CRPS, n=15 | | 3.0  (± 3.2) | 2.5  (± 3.2) | 4.0  (± 5.0) | 13.4  (± 12.8) | 19.7  (± 17.8) | 19.5  (± 13.8) | 30.2  (± 22.1) |
| HC, n=15 | | 1.0  (± 1.1) | 2.4  (± 3.0) | 3.0  (± 3.3) | 5.2  (± 4.1) | 7.9  (± 8.1) | 13.9  (± 10.6) | 18.5  (± 14.4) |

*CRPS: complex regional pain syndrome; HC: healthy control; HPT: heat pain threshold; MPS: mechanical pain sensitivity; MPT: mechanical pain threshold; NRS: numeric rating scale; SD: standard deviation*

**Table S3:** Model statistics for comparison of normalized components of CHEPs, heat pain ratings and QST z-scores.

|  | area | | cohort | | area x cohort | |
| --- | --- | --- | --- | --- | --- | --- |
|  | F-value | p-value | F-value | p-value | F-value | p-value |
| a) normalized N2-latency | 0.1 | 0.91 | 0.33 | 0.57 | 18.3 | 0.17 |
| b) normalized P2-latency | 0.88 | 0.42 | 0.52 | 0.47 | 2.67 | 0.08 |
| c) normalized N2P2-amplitude | 1.14 | 0.33 | 3.14 | 0.09 | 1.56 | 0.21 |
| d) normalized N2-amplitude | 1.91 | 0.16 | 1.13 | 0.3 | 2.66 | 0.08 |
| e) normalized P2-amplitude | 3.65 | 0.03 | 3.47 | 0.07 | 0.28 | 0.76 |
| f) normalized heat pain rating | 3.92 | 0.03 | 1.97 | 0.17 | 1.84 | 0.17 |
| g) MPS z-score | 2.14 | 0.13 | 2.18 | 0.15 | 3.69 | 0.03 |
| h) MPT z-score | 6.31 | 0.003 | 0.0009 | 0.98 | 2.55 | 0.09 |
| i) HPT z-score | 4.88 | 0.01 | 3.22 | 0.08 | 0.51 | 0.6 |

*CHEPs: contact heat evoked potentials; HPT: heat pain threshold; MPS: mechanical pain sensitivity; MPT: mechanical pain threshold; QST: quantitative sensory testing*

**Table S4:** Post-hoc comparisons of normalized components of CHEPs, heat pain ratings and QST z-scores between cohorts (CRPS vs. HC) in all tested areas (painful, contralateral and control).

|  |  | CRPS vs. HC | |
| --- | --- | --- | --- |
|  |  | t-value | p-value |
| a) normalized N2-latency | | | |
|  | painful | -0.47 | 0.64 |
|  | contralateral | 0.75 | 0.46 |
|  | control | 1.2 | 0.24 |
| b) normalized P2-latency | | | |
|  | painful | -0.46 | 0.65 |
|  | contralateral | 1.29 | 0.2 |
|  | control | 1.07 | 0.29 |
| c) normalized N2P2-amplitude | | | |
|  | painful | 2.31 | 0.025 |
|  | contralateral | 0.85 | 0.4 |
|  | control | 1.49 | 0.14 |
| d) normalized N2-amplitude | | | |
|  | painful | 2.05 | 0.046 |
|  | contralateral | 0.22 | 0.83 |
|  | control | 0.47 | 0.64 |
| e) normalized P2-amplitude | | | |
|  | painful | 1.6 | 0.11 |
|  | contralateral | 1.18 | 0.24 |
|  | control | 1.87 | 0.07 |
| f) normalized heat pain rating | | | |
|  | painful | 1.96 | 0.056 |
|  | contralateral | 1.17 | 0.25 |
|  | control | 0.82 | 0.42 |
| g) MPS z-score | | | |
|  | painful | 2.61 | 0.012 |
|  | contralateral | 0.7 | 0.49 |
|  | control | 0.6 | 0.55 |
| h) MPT z-score | | | |
|  | painful | 1.14 | 0.26 |
|  | contralateral | 0.04 | 0.97 |
|  | control | -1.2 | 0.23 |
| i) HPT z-score | | | |
|  | painful | 2.03 | 0.046 |
|  | contralateral | 0.93 | 0.36 |
|  | control | 1.11 | 0.27 |

*CHEPs: contact heat evoked potentials; CRPS: complex regional pain syndrome; HC: healthy control; HPT: heat pain threshold; MPS: mechanical pain sensitivity; MPT: mechanical pain threshold; QST: quantitative sensory testing*

|  |  | contralateral vs. painful | | control vs. painful | | contralateral vs. control | |
| --- | --- | --- | --- | --- | --- | --- | --- |
|  |  | t-value | p-value | t-value | p-value | t-value | p-value |
| a) normalized N2-latency | | | | | | | |
|  | CRPS | 1.17 | 0.75 | 1.59 | 0.36 | -0.44 | 1 |
|  | HC | -0.74 | 1 | -1.03 | 0.93 | 0.24 | 1 |
| b) normalized P2-latency | | | | | | | |
|  | CRPS | 1.83 | 0.22 | 2.23 | 0.09 | -0.43 | 1 |
|  | HC | -1.16 | 0.75 | -0.4 | 1 | -0.75 | 1 |
| c) normalized N2P2-amplitude | | | | | | | |
|  | CRPS | -1.81 | 0.23 | -0.28 | 1 | -1.71 | 0.28 |
|  | HC | 0.66 | 1 | 1.19 | 0.72 | -0.49 | 1 |
| d) normalized N2-amplitude | | | | | | | |
|  | CRPS | -2.74 | 0.025 | -2.26 | 0.08 | -0.55 | 1 |
|  | HC | 0.2 | 1 | 0.3 | 1 | -0.09 | 1 |
| e) normalized P2-amplitude | | | | | | | |
|  | CRPS | 0.15 | 1 | 1.92 | 0.18 | -1.99 | 0.16 |
|  | HC | 0.83 | 1 | 1.71 | 0.28 | -0.81 | 1 |
| f) normalized heat pain rating | | | | | | | |
|  | CRPS | -2.97 | 0.013 | -2.11 | 0.12 | -0.75 | 1 |
|  | HC | -1 | 0.96 | 0.52 | 1 | -1.5 | 0.42 |
| g) MPS z-score | | | | | | | |
|  | CRPS | -3.12 | 0.008 | -2.04 | 0.14 | -0.92 | 1 |
|  | HC | 0.21 | 1 | 1.27 | 0.62 | -1.07 | 0.87 |
| h) MPT z-score | | | | | | | |
|  | CRPS | -2.21 | 0.09 | -4.13 | 0.0003 | 1.98 | 0.16 |
|  | HC | -0.64 | 1 | -0.9 | 1 | 0.27 | 1 |
| i) HPT z-score | | | | | | | |
|  | CRPS | -1.63 | 0.33 | -2.75 | 0.024 | 1.17 | 0.74 |
|  | HC | -0.23 | 1 | -1.67 | 0.3 | 1.44 | 0.47 |

**Table S5:** Post-hoc comparisons of normalized components of CHEPs, heat pain ratings and QST z-scores between tested areas (painful, contralateral and control) in both cohorts (CRPS and HC).

*CHEPs: contact heat evoked potentials; CRPS: complex regional pain syndrome; HC: healthy control; HPT: heat pain threshold; MPS: mechanical pain sensitivity; MPT: mechanical pain threshold; QST: quantitative sensory testing*
